# Supplementary material for: Discovering Hair Biomarkers of Alzheimer’s Disease Using High Resolution Mass Spectrometry-Based Untargeted Metabolomics
Source: MDPI journal article supplement (doi:10.3390/molecules28052166), 2023-02-25
Supplement: s1 [file s1]

## Supplementary material

### Discovering hair biomarkers of Alzheimer's disease using high resolution mass spectrometry-based untargeted metabolomics

Yu-Hsiang Su <sup>1</sup>, Chih-Wei Chang <sup>2, †</sup>, Jen-Yi Hsu <sup>2</sup>, Shih-Wen Li <sup>2</sup>, Pi-Shan Sung <sup>3</sup>, Ru-Hsueh Wang <sup>4</sup>, Chih-Hsing Wu <sup>4,5</sup>, Pao-Chi Liao <sup>2,6, \*</sup>

1. Division of Neurology, Department of Internal Medicine, Ditmanson Medical Foundation Chia-Yi Christian Hospital, Chiayi City 60002, Taiwan
2. Department of Environmental and Occupational Health, College of Medicine, National Cheng Kung University, Tainan, 704, Taiwan
3. Department of Neurology, National Cheng Kung University Hospital, College of Medicine, National Cheng Kung University, Tainan, 704, Taiwan
4. Department of Family Medicine, National Cheng Kung University Hospital, College of Medicine, National Cheng Kung University, Tainan, 704, Taiwan
5. Institute of Gerontology, College of Medicine, National Cheng Kung University, Tainan, 701, Taiwan
6. Department of Food Safety/Hygiene and Risk Management, College of Medicine, National Cheng Kung University, Tainan, 701, Taiwan

† The author contributed equally to this work.

\*Corresponding author:

Dr. Pao-Chi Liao

Department of Environmental and Occupational Health, College of Medicine,  
National Cheng Kung University, 138 Sheng-Li Road, Tainan, 704, Taiwan,

Tel: 886-6-2353535 ext 5566

Fax: 886-6-2752484

Email: [liaopc@mail.ncku.edu.tw](mailto:liaopc@mail.ncku.edu.tw)

### **Figure content**

**Figure S1. Quality control (QC) of the analytical method.** (A) RSD distribution of all the detected peak features in the QC samples. Red line represents the 85% of all detected peaks. (B) RSD distribution in the QC sample of the discriminatory peak features between AD and controls. Red line represents 90% of the discriminatory peak features.

**Figure S2. Correlations between 10 metabolites and MoCA score** (A) acetyl-L-carnitine, (B) propionylcarnitine, (C) butyrylcarnitine, (D) O-valeroyl-L-carnitine, (E) 6-O-methylnorlaudanoline, (F) PC (16:0/0:0), (G) LPC 18:1, (H) pyridoxal, (I) hydroxypropyl-leucine, and (J) piperine.

### **Table content**

**Table S1. The 72 discriminatory peak features analyzed by fold change and Student's t test.**

**Table S2. Chemical structures annotated by MS-FINDER and MoNA within MS-DIAL.**

**Table S1. The 72 discriminatory peak features analyzed by fold change and Student's t test.**

| Peak No. | Retention time (min) | m/z      | AD / Control | P      |
|----------|----------------------|----------|--------------|--------|
| #01      | 0.81                 | 134.0762 | 0.49         | 0.0091 |
| #02      | 7.89                 | 145.0647 | 12.46        | 0.0095 |
| #03      | 0.84                 | 149.5973 | 0.38         | 0.0050 |
| #04      | 1.74                 | 150.0549 | 0.28         | 0.0077 |
| #05      | 1.25                 | 198.037  | 0.47         | 0.0039 |
| #06      | 4.68                 | 199.0865 | 0.48         | 0.0010 |
| #07      | 0.98                 | 204.1228 | 0.40         | 0.0005 |
| #08      | 4.43                 | 213.1231 | 0.33         | 0.0084 |
| #09      | 1.90                 | 218.1384 | 0.35         | 0.0035 |
| #10      | 1.08                 | 218.1385 | 0.30         | 0.0028 |
| #11      | 2.52                 | 229.1178 | 0.31         | 0.0036 |
| #12      | 4.47                 | 232.1541 | 0.38         | 0.0019 |
| #13      | 4.43                 | 235.1072 | 0.30         | 0.0089 |
| #14      | 9.63                 | 240.1955 | 0.24         | 0.0058 |
| #15      | 1.04                 | 245.1493 | 0.30         | 0.0041 |
| #16      | 5.12                 | 246.1593 | 0.42         | 0.0077 |
| #17      | 5.11                 | 246.1696 | 0.43         | 0.0019 |
| #18      | 1.57                 | 247.1284 | 0.46         | 0.0093 |
| #19      | 7.89                 | 247.1437 | 16.98        | 0.0100 |
| #20      | 5.11                 | 248.1749 | 0.41         | 0.0020 |
| #21      | 8.71                 | 261.1458 | 0.34         | 0.0031 |
| #22      | 4.07                 | 267.0953 | 0.40         | 0.0080 |
| #23      | 6.39                 | 268.1151 | 6.75         | 0.0097 |
| #24      | 8.44                 | 272.1276 | 0.26         | 0.0010 |
| #25      | 1.26                 | 272.1963 | 0.44         | 0.0069 |
| #26      | 4.50                 | 274.1756 | 0.41         | 0.0094 |
| #27      | 5.07                 | 276.1589 | 7.19         | 0.0074 |
| #28      | 2.32                 | 281.1126 | 4.75         | 0.0051 |
| #29      | 8.93                 | 286.1431 | 0.35         | 0.0020 |
| #30      | 9.06                 | 286.1431 | 0.37         | 0.0020 |
| #31      | 9.14                 | 286.1431 | 0.34         | 0.0018 |
| #32      | 5.71                 | 288.1590 | 10.12        | 0.0021 |
| #33      | 5.56                 | 290.1745 | 179.00       | 0.0030 |
| #34      | 5.56                 | 292.1807 | 10.67        | 0.0075 |
| #35      | 7.15                 | 302.1379 | 0.17         | 0.0042 |

|     |       |          |        |        |
|-----|-------|----------|--------|--------|
| #36 | 7.28  | 302.1379 | 0.21   | 0.0044 |
| #37 | 7.28  | 303.1415 | 0.10   | 0.0059 |
| #38 | 6.24  | 304.1538 | 6.47   | 0.0087 |
| #39 | 9.77  | 312.1586 | 0.26   | 0.0093 |
| #40 | 6.25  | 327.1368 | 6.48   | 0.0099 |
| #41 | 10.90 | 329.2467 | 0.39   | 0.0082 |
| #42 | 4.98  | 344.1233 | 4.86   | 0.0070 |
| #43 | 6.68  | 353.2216 | 0.39   | 0.0000 |
| #44 | 7.34  | 364.2262 | 18.06  | 0.0097 |
| #45 | 6.69  | 365.1974 | 11.61  | 0.0046 |
| #46 | 6.21  | 366.2056 | 77.20  | 0.0065 |
| #47 | 11.21 | 366.2994 | 0.39   | 0.0010 |
| #48 | 9.04  | 367.2374 | 0.45   | 0.0011 |
| #49 | 6.61  | 378.2056 | 17.77  | 0.0054 |
| #50 | 6.69  | 379.9793 | 87.88  | 0.0047 |
| #51 | 6.42  | 380.2211 | 24.93  | 0.0074 |
| #52 | 6.69  | 380.2211 | 58.60  | 0.0030 |
| #53 | 5.69  | 382.2005 | 18.49  | 0.0065 |
| #54 | 5.95  | 382.2005 | 17.46  | 0.0084 |
| #55 | 6.69  | 382.2274 | 69.98  | 0.0032 |
| #56 | 6.51  | 382.2368 | 89.53  | 0.0040 |
| #57 | 9.14  | 385.2473 | 0.35   | 0.0018 |
| #58 | 8.94  | 385.2474 | 0.32   | 0.0005 |
| #59 | 6.13  | 396.2161 | 135.20 | 0.0051 |
| #60 | 6.51  | 396.2162 | 123.54 | 0.0064 |
| #61 | 6.13  | 398.2222 | 17.78  | 0.0082 |
| #62 | 5.56  | 407.2531 | 43.01  | 0.0056 |
| #63 | 6.01  | 412.2109 | 68.92  | 0.0029 |
| #64 | 6.45  | 414.2266 | 94.70  | 0.0069 |
| #65 | 6.18  | 424.2583 | 252.94 | 0.0024 |
| #66 | 8.80  | 481.3044 | 0.34   | 0.0081 |
| #67 | 10.66 | 496.3388 | 0.42   | 0.0013 |
| #68 | 6.70  | 497.2996 | 10.55  | 0.0028 |
| #69 | 10.66 | 497.3419 | 0.38   | 0.0056 |
| #70 | 6.13  | 513.2948 | 664.05 | 0.0044 |
| #71 | 10.92 | 522.3543 | 0.40   | 0.0046 |
| #72 | 6.71  | 795.4117 | 270.16 | 0.0032 |

---

**Table S2. Chemical structures annotated by MS-FINDER and MoNA within MS-DIAL.**

| Compound name                                                    | Formula    | m/z      | Retention time<br>(min) | ID method      | MS-DIAL        | MS-FINDER        | MS-FINDER          |
|------------------------------------------------------------------|------------|----------|-------------------------|----------------|----------------|------------------|--------------------|
|                                                                  |            |          |                         |                | match<br>score | Formula<br>score | structure<br>score |
| L-Acetylcarnitine                                                | C9H17NO4   | 204.1228 | 0.98                    | MoNA/MS-Finder | 71.8           | 3.66             | 6.21               |
| Hydroxypropyl-Leucine                                            | C11H20N2O4 | 245.1493 | 1.04                    | MS-Finder      |                | 3.60             |                    |
| Pyridoxal                                                        | C8H9NO3    | 150.0549 | 1.74                    | MoNA           | 79.3           |                  |                    |
| Propionylcarnitine                                               | C8H17NO4   | 218.1384 | 1.90                    | MS-Finder      |                | 3.93             | 6.7                |
| Butyryl-carnitine                                                | C11H21NO4  | 232.1541 | 4.47                    | MoNA/MS-Finder | 95.6           | 3.55             | 5.91               |
| Valeryl-carnitine                                                | C12H23NO4  | 246.1696 | 5.11                    | MoNA/MS-Finder | 90.8           | 3.55             | 5.99               |
| Hyoscyamine                                                      | C17H23NO3  | 290.1745 | 5.56                    | MoNA/MS-Finder | 81.8           | 3.61             | 6.98               |
| Cyrmenin A                                                       | C22H34N2O5 | 407.2531 | 5.56                    | MS-Finder      |                | 3.42             |                    |
| Galantamine                                                      | C17H21NO3  | 288.1590 | 5.71                    | MS-Finder      |                | 3.54             |                    |
| Sacubitril                                                       | C24H29NO5  | 412.2109 | 6.01                    | MS-Finder      |                | 3.85             |                    |
|                                                                  | C24H29NO4  | 396.2161 | 6.13                    | MS-Finder      |                | 3.70             |                    |
|                                                                  | C25H33N3O3 | 424.2583 | 6.18                    | MS-Finder      |                | 3.02             |                    |
| 6-O-Desmethyldonepezil                                           | C23H27NO3  | 366.2056 | 6.21                    | MS-Finder      |                | 4.05             | 7.18               |
| Scopolamine                                                      | C17H21NO4  | 304.1538 | 6.24                    | MS-Finder      |                | 3.74             | 7.19               |
|                                                                  | C24H31NO5  | 414.2266 | 6.45                    | MS-Finder      |                | 3.77             |                    |
| 2-benzoyl-1-(2,5-dimethoxyphenyl)-<br>decahydroisoquinolin-4a-ol | C24H29NO4  | 396.2162 | 6.51                    | MS-Finder      |                | 3.69             |                    |
|                                                                  | C24H27NO3  | 378.2056 | 6.61                    | MS-Finder      |                | 3.58             |                    |
|                                                                  | C21H28NO3  | 365.1974 | 6.69                    | MS-Finder      |                | 3.23             |                    |

|                          |            |          |       |                |      |      |      |
|--------------------------|------------|----------|-------|----------------|------|------|------|
| Donepezil                | C24H29NO3  | 380.2211 | 6.69  | MoNA/MS-Finder | 92.1 | 3.83 | 7.25 |
| 6-O-methylnorlaudanoline | C17H19NO4  | 302.1379 | 7.15  | MS-Finder      |      | 3.78 |      |
|                          | C24H29NO2  | 364.2262 | 7.34  | MS-Finder      |      | 3.26 |      |
| Lenticin                 | C14H18N2O2 | 247.1437 | 7.89  | MoNA/MS-Finder | 95.8 | 3.36 | 5.71 |
| Piperine                 | C17H19NO3  | 286.1431 | 9.14  | MoNA/MS-Finder | 94.8 | 3.69 | 6.59 |
| PC(16:0/0:0)             | C24H50NO7P | 496.3388 | 10.66 | MoNA           | 88.6 |      |      |
| LPC 18:1                 | C26H52NO7P | 522.3543 | 10.92 | MoNA           | 75.2 |      |      |

---

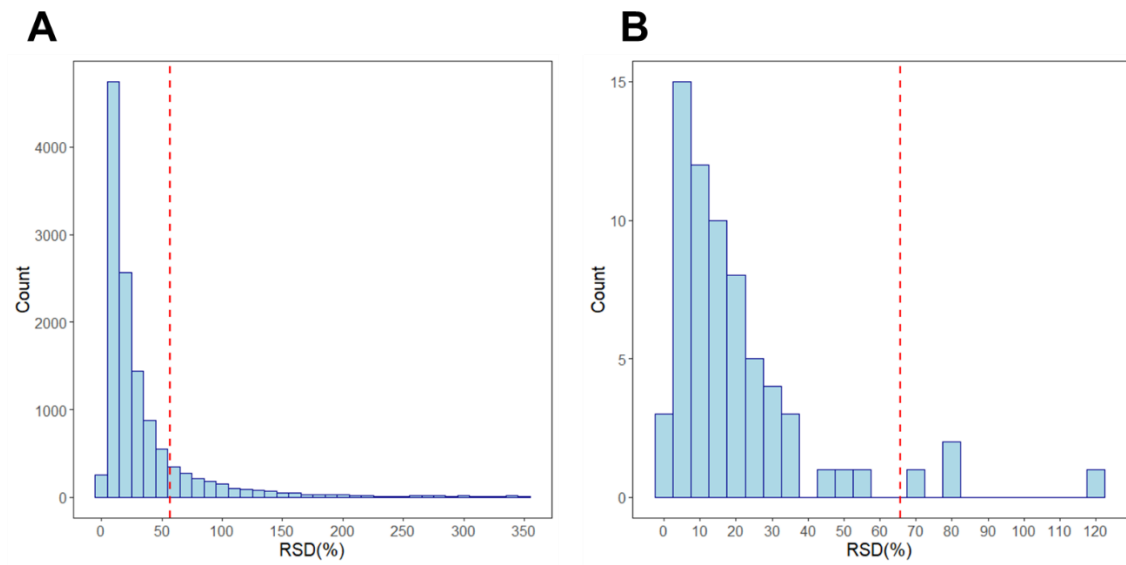

**Figure S1. Quality control (QC) of the analytical method.** (A) RSD distribution of all the detected peak features in the QC samples. Red line represents the 85% of all detected peaks. (B) RSD distribution in the QC sample of the discriminatory peak features between AD and controls. Red line represents 90% of the discriminatory peak features.

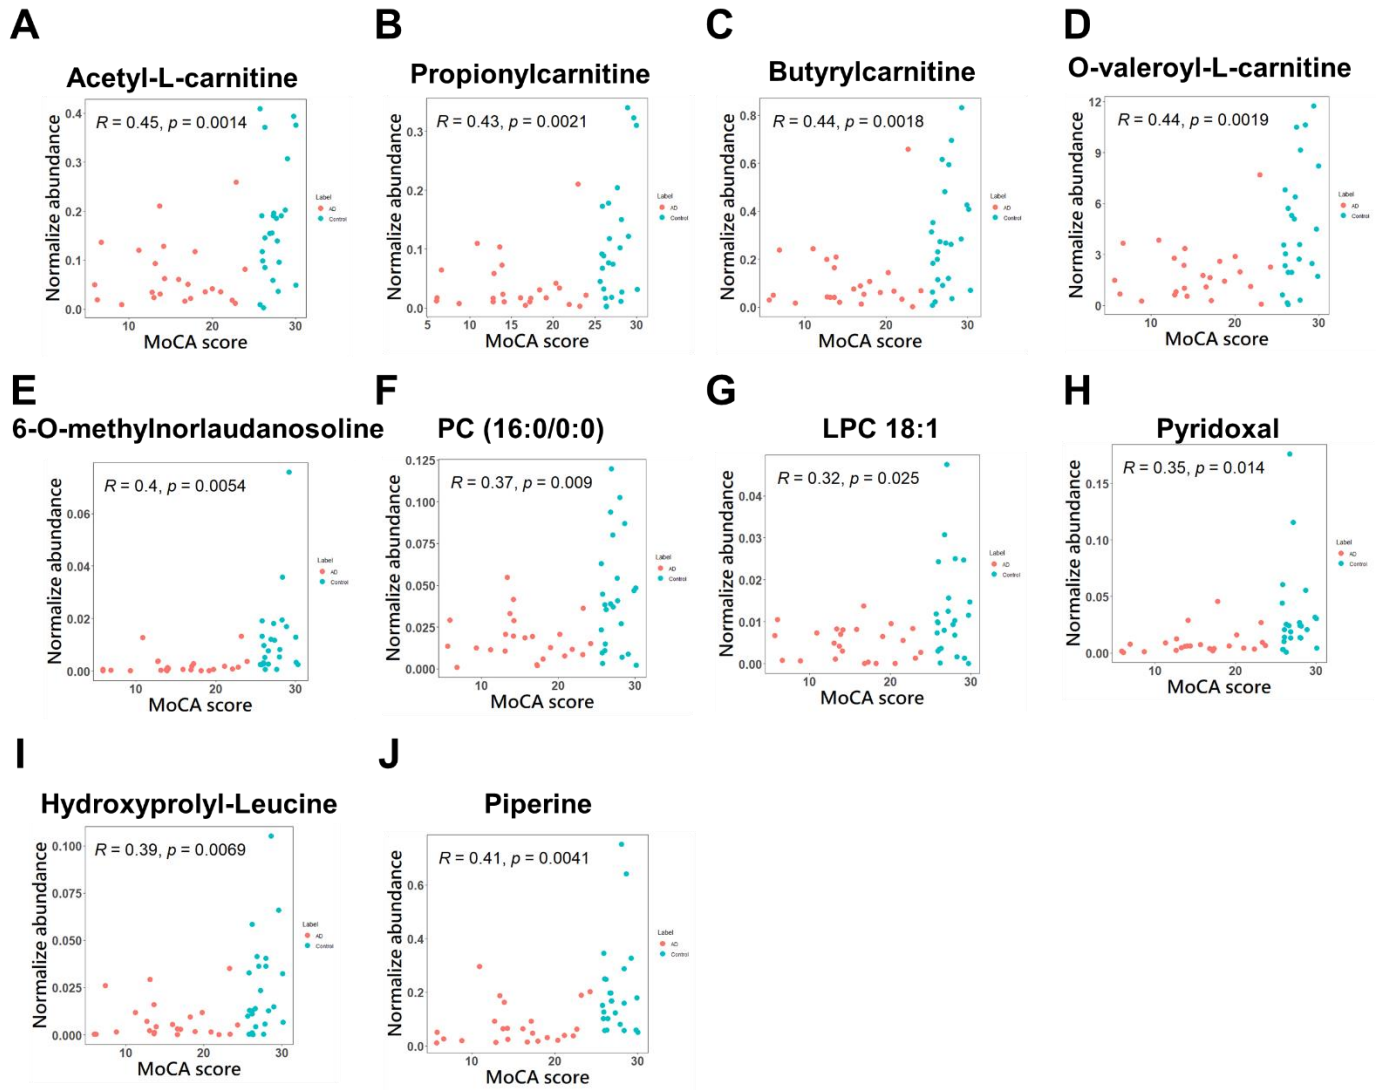

**Figure S2. Correlations between 10 metabolites, (A) acetyl-L-carnitine, (B) propionylcarnitine, (C) butyrylcarnitine, (D) O-valeroyl-L-carnitine, (E) 6-O-methylnorlaudanosoline, (F) PC (16:0/0:0), (G) LPC 18:1, (H) pyridoxal, (I) hydroxypropyl-leucine, and (J) piperine, and MoCA score.**
